# Supplementary material
Source: publisher figshare collection journal article supplement (https://frontiersin.figshare.com/ndownloader/files/18539138)
Supplement: Supplementary file [file 18539138]

## Supplementary Material

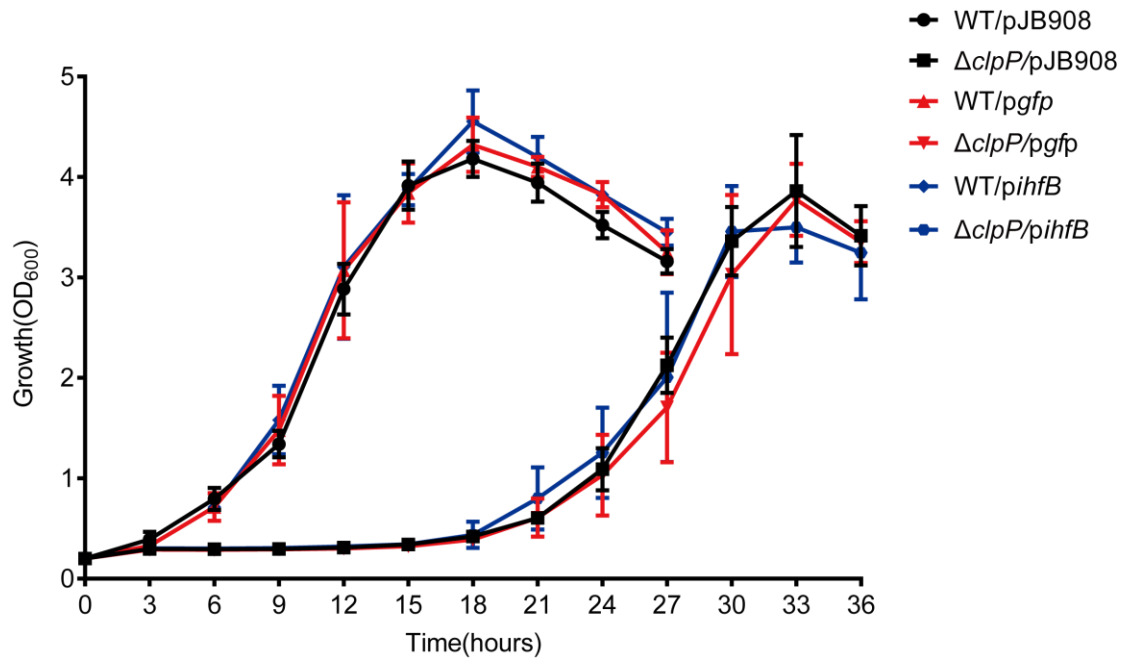

**Supplementary Figure S6. The expression of GFP and IHFB does not affect the growth of *L. pneumophila* in both WT and  $\Delta clpP$ , indicating that the affection of the bacterial growth by CsrA is regulated by ClpP, but not due to the stress caused by accumulation of overexpressed protein.**

Growth curves of *L. pneumophila* wild-type strain WT (●), the *clpP* deletion mutant  $\Delta clpP$  (■), WT with *gfp* expression (WT/pgfp) (▲),  $\Delta clpP$  with *gfp* expression ( $\Delta clpP$ /pgfp) (▼), WT with *ihfB* expression (WT/pihfB) (◆) and  $\Delta clpP$  with *ihfB* expression ( $\Delta clpP$ /pihfB) (■). For negative controls, pJB908 vector was electroporated into WT and  $\Delta clpP$  to create WT/pJB908,  $\Delta clpP$ /pJB908. Bacterial strains at TP ( $OD_{600}=3.0-3.5$ ) were grown in AYE medium at 37 °C and samples were taken every 3 h for determination of optical density at 600 nm.
